# Supplementary material for: Joint Entropy Based Multi-Objective Evolutionary Optimization of Water Distribution Networks
Source: Springer Nature journal article supplement (doi:10.1007/s11269-017-1888-y), 2018-04-12
Supplement: MOESM1 [file 15649318]

# WATER RESOURCES MANAGEMENT

## Joint Entropy Based Multi-objective Evolutionary Optimization of Water Distribution Networks: Supplementary Data

Tiku T. Tanyimboh<sup>1,2\*</sup> and Anna M. Czajkowska<sup>2,3</sup>

Tiku T. Tanyimboh<sup>1,2</sup>, PhD (\*Corresponding author)

<sup>1</sup>School of Civil and Environmental Engineering, University of the Witwatersrand,  
Johannesburg, Private Bag 3, WITS 2050 South Africa

<sup>2</sup>Department of Civil and Environmental Engineering, University of Strathclyde, Glasgow,  
James Weir Building, 75 Montrose Street, Glasgow G1 1XJ, UK

Email: tiku.tanyimboh@wits.ac.za; Tel: + 27 (0) 11 717 7105

ORCID ID: <https://orcid.org/0000-0003-3741-7689>

Anna M. Czajkowska<sup>2,3</sup>, PhD

<sup>2</sup>Department of Civil and Environmental Engineering, University of Strathclyde, Glasgow,  
James Weir Building, 75 Montrose Street, Glasgow G1 1XJ, UK

<sup>3</sup>RPS Group, Merchantile Building, 53 Bothwell Street, Glasgow G2 6TS, UK

Cite this article as: Tanyimboh TT, Czajkowska AM (2018) Joint entropy based multi-objective evolutionary optimization of water distribution networks. *Water Resources Management*, DOI: 10.1007/s11269-017-1888-y

Funding: This project was funded by the UK Engineering and Physical Sciences Research Council (EPSRC) (EPSRC Grant Number EP/G055564/1).

## SUPPLEMENTARY DATA

### Appendix A: Informational Entropy Function

The informational entropy of the pipe flow rates for the  $k^{\text{th}}$  loading condition is (Tanyimboh and Templeman 1993a, 1993b)

$$S_k = S_{0,k} + \sum_{n=1}^{nn} p_{n,k} S_{n,k} ; \forall k \quad (\text{A1})$$

where  $S_k$  is the entropy;  $S_{0,k}$  is the entropy due to the contributions of the supply nodes;  $S_{n,k}$  is the entropy at node  $n$ ; and  $nn$  is the number of nodes in the network.  $p_{n,k} \equiv T_{n,k}/T_k$  is the fraction of the total flow through the network that reaches node  $n$ ;  $T_{n,k}$  is the total flow that reaches node  $n$ ; and  $T_k$  is the sum of the nodal demands, for the  $k^{\text{th}}$  loading condition.

The entropy due to the contributions of the supply nodes is

$$S_{0,k} = - \sum_{n \in I_k} \frac{Q_{0n,k}}{T_k} \ln \left( \frac{Q_{0n,k}}{T_k} \right); \quad \forall k \quad (\text{A2})$$

$Q_{0n,k}$  is the flow at supply node  $n$  and  $I_k$  represents the set of supply nodes for the  $k^{\text{th}}$  loading condition. Similarly, the entropy at demand node  $n$  is

$$S_{n,k} = - \frac{Q_{n0,k}}{T_{n,k}} \ln \left( \frac{Q_{n0,k}}{T_{n,k}} \right) - \sum_{ij \in ND_{n,k}} \frac{Q_{ij,k}}{T_{n,k}} \ln \left( \frac{Q_{ij,k}}{T_{n,k}} \right); \quad n = 1, \dots, nn, \forall k \quad (\text{A3})$$

$Q_{n0,k}$  is the demand at node  $n$ ;  $Q_{ij,k}$  is the flow rate in pipe  $ij$  with nodes  $i$  and  $j$  as the upstream and downstream nodes, respectively. The set  $ND_{n,k}$  represents the pipe flows from node  $n$ .

A comparison of the entropy models proposed in Awumah *et al.* (1990, 1991) and Tanyimboh and Templeman (1993a, 1993b) is available in Tanyimboh (1993) where, *inter alia*, it was observed that there were inconsistencies in the probability models used in Awumah *et al.* (1990, 1991).

## Appendix B: Network Performance Evaluation

Two of the criteria used to assess the solutions achieved by the proposed maximum entropy approach were the hydraulic capacity reliability and failure tolerance. By definition, the hydraulic capacity reliability incorporates the mechanical reliability. Pressure-driven analysis was used to simulate the effects of pipe failures, based on the logistic nodal pressure-discharge function (Tanyimboh and Templeman 2010).

The definition used for the hydraulic (capacity) reliability is the ability to fulfil the nodal demands at adequate pressure under both normal and abnormal operating conditions (Tanyimboh and Templeman 2000). The nodal demands usually refer to the peak loading condition, and the reliability refers to the fraction of the demands satisfied at adequate pressure.

$$R = \frac{1}{T} \left( p(0)T(0) + \sum_{m=1}^{np} p(m)T(m) + \sum_{m=1}^{np-1} \sum_{n=m+1}^{np} p(m,n)T(m,n) + \dots \right) + \frac{1}{2} \left( 1 - p(0) - \sum_{m=1}^{np} p(m) - \sum_{m=1}^{np-1} \sum_{n=m+1}^{np} p(m,n) - \dots \right) \quad (B1)$$

where  $R$  represents the hydraulic reliability;  $np$  is the number of pipes or links in the network;  $p(0)$  is the probability that all links are in service;  $p(m)$  is the probability that only link  $m$  is not in service;  $p(m, n)$  is the probability that only links  $m$  and  $n$  are not in service.  $T$  is the sum of the nodal demands;  $T(0)$ ,  $T(m)$  and  $T(m, n)$  represent the respective total flows supplied with zero link, only link  $m$ , and only links  $m$  and  $n$  out of service. The probabilistic pipe failure model developed by Cullinane *et al.* (1992) was used.

The pipe or link failure tolerance (Tanyimboh *et al.* 2001) provides an estimate of the total demand that the water distribution network is capable of satisfying on average when one or more components are out of service. The need to include the failure tolerance when assessing the hydraulic properties and resilience of water distribution networks has been discussed previously in the literature (Gheisi and Naser 2013, 2015).

The pipe failure tolerance,  $FT$ , and hydraulic reliability,  $R$ , are related as follows (Tanyimboh *et al.* 2001).

$$FT = \frac{R - p(0)T(0)/T}{1 - p(0)} \quad (B2)$$

The failure tolerance is usually evaluated at the same time as the hydraulic reliability and it is a simple calculation once  $R$  and  $p(0)$  are available. To calculate the hydraulic reliability, the *minimum* number of pressure-driven simulations required for each solution under consideration is  $np+1$ ;  $np$  is the number of links or pipes. Generally, the procedure is highly expensive computationally, especially if there are many Pareto sets with large populations to analyse.

## REFERENCES

- Awumah K, Goulter I, Bhatt SK (1990) Assessment of reliability in water distribution networks using entropy based measures. *Stoch. Hydrol. Hydraul.* 4(4): 309-320
- Awumah K, Goulter I, Bhatt SK (1991) Entropy-based redundancy measures in water distribution network design. *J. Hydraulic Engineering* 117(5): 595-614
- Cullinane MJ, Lansey KE, Mays LW (1992) Optimization-availability-based design of water distribution networks. *J. Hydraulic Engineering* 118: 420-441
- Gheisi A, Naser G (2013) On the significance of maximum number of component failures in reliability analysis of water distribution systems. *Urban Water* 10(1): 10-25
- Gheisi A, Naser G (2015) Multistate reliability of water-distribution systems: comparison of surrogate measures. *J. Water Res. Pl.-ASCE* 141(10)
- Tanyimboh TT (1993) An entropy based approach to the optimum design of reliable water distribution networks. PhD Thesis, University of Liverpool, UK
- Tanyimboh T, Tabesh M, Burrows R (2001) An appraisal of source head methods for calculating the reliability of water distribution networks. *J. Water Res. Pl.-ASCE* 127(4):

206-213

Tanyimboh TT, Templeman AB (1993a) Calculating maximum entropy flows in networks. *J.*

*Operational Research Society* 44(4): 383-396

Tanyimboh TT, Templeman AB (1993b) Optimum design of flexible water distribution networks. *Civil Engineering Systems* 10(3): 243-258

Tanyimboh TT, Templeman AB (2000) A quantified assessment of the relationship between the reliability and entropy of water distribution systems. *Eng. Optim.* 33(2): 179-199

Tanyimboh TT, Templeman AB (2010) Seamless pressure-deficient water distribution system model. *J. Water Management* 163(8): 389-396

## Appendix C: Additional Results

Table C1 Non-dominated feasible solutions achieved

| Design | Cost<br>(€10 <sup>6</sup> ) | Surplus Head (m) |                |                | Entropy        |                |                | Total<br>Entropy |
|--------|-----------------------------|------------------|----------------|----------------|----------------|----------------|----------------|------------------|
|        |                             | Peak<br>Demand   | Fire<br>Flow 1 | Fire<br>Flow 2 | Peak<br>Demand | Fire<br>Flow 1 | Fire<br>Flow 2 |                  |
| 1      | 8.074                       | 0.030            | 13.619         | 13.828         | 5.125          | <i>5.033</i>   | <b>5.134</b>   | 15.292           |
| 2      | 8.150                       | 0.030            | 13.768         | 13.528         | 5.175          | <b>5.205</b>   | <i>5.171</i>   | 15.551           |
| 3      | 8.155                       | 0.066            | 13.632         | 13.422         | 5.214          | <i>5.140</i>   | <b>5.277</b>   | 15.631           |
| 4      | 8.168                       | 0.087            | 13.279         | 13.872         | <i>5.247</i>   | <b>5.342</b>   | 5.267          | 15.856           |
| 5      | 8.193                       | 0.010            | 13.479         | 13.914         | 5.277          | <b>5.341</b>   | <i>5.248</i>   | 15.866           |
| 6      | 8.215                       | 0.106            | 13.596         | 14.007         | 5.322          | <b>5.372</b>   | <i>5.286</i>   | 15.980           |
| 7      | 8.253                       | 0.173            | 13.857         | 13.771         | <i>5.316</i>   | <b>5.366</b>   | 5.337          | 16.019           |
| 8      | 8.288                       | 0.048            | 13.484         | 11.647         | 5.413          | <b>5.487</b>   | <i>5.410</i>   | 16.310           |
| 9      | 8.319                       | 0.064            | 13.761         | 13.636         | <b>5.521</b>   | 5.515          | <i>5.504</i>   | 16.540           |
| 10     | 8.335                       | 0.104            | 13.722         | 13.898         | 5.586          | <i>5.537</i>   | <b>5.606</b>   | 16.729           |
| 11     | 8.355                       | 0.054            | 13.788         | 11.609         | <b>5.612</b>   | <i>5.579</i>   | 5.596          | 16.787           |
| 12     | 8.362                       | 0.006            | 13.583         | 13.423         | 5.660          | <i>5.639</i>   | <b>5.737</b>   | 17.036           |
| 13     | 8.408                       | 0.123            | 13.798         | 13.295         | 5.942          | <i>5.917</i>   | <b>5.952</b>   | 17.811           |
| 14     | 8.464                       | 0.007            | 13.637         | 13.474         | 5.935          | <i>5.905</i>   | <b>6.004</b>   | 17.844           |
| 15     | 8.473                       | 0.037            | 13.711         | 13.555         | 6.034          | <i>6.021</i>   | <b>6.104</b>   | 18.159           |
| 16     | 8.492                       | 0.050            | 13.797         | 12.840         | <b>6.181</b>   | <i>6.150</i>   | 6.180          | 18.511           |
| 17     | 8.509                       | 0.007            | 13.697         | 13.418         | 6.232          | <i>6.207</i>   | <b>6.295</b>   | 18.734           |
| 18     | 8.561                       | 0.025            | 13.737         | 13.042         | 6.259          | <i>6.231</i>   | <b>6.311</b>   | 18.801           |
| 19     | 8.583                       | 0.044            | 13.729         | 13.517         | 6.270          | <i>6.234</i>   | <b>6.346</b>   | 18.850           |
| 20     | 8.610                       | 0.019            | 13.701         | 13.507         | 6.301          | <i>6.267</i>   | <b>6.368</b>   | 18.936           |
| 21     | 8.619                       | 0.019            | 13.676         | 13.555         | 6.334          | <i>6.278</i>   | <b>6.402</b>   | 19.014           |
| 22     | 8.642                       | 0.002            | 13.683         | 13.521         | 6.358          | <i>6.317</i>   | <b>6.411</b>   | 19.086           |
| 23     | 8.668                       | 0.039            | 13.720         | 13.544         | 6.400          | <i>6.355</i>   | <b>6.468</b>   | 19.223           |
| 24     | 8.684                       | 0.022            | 13.699         | 13.506         | 6.414          | <i>6.370</i>   | <b>6.486</b>   | 19.270           |
| 25     | 8.686                       | 0.032            | 13.770         | 13.617         | 6.438          | <i>6.392</i>   | <b>6.506</b>   | 19.336           |
| 26     | 8.718                       | 0.024            | 13.714         | 13.533         | 6.433          | <i>6.408</i>   | <b>6.534</b>   | 19.375           |
| 27     | 8.744                       | 0.030            | 13.724         | 13.492         | 6.456          | <i>6.428</i>   | <b>6.537</b>   | 19.421           |
| 28     | 8.750                       | 0.010            | 13.711         | 13.515         | 6.485          | <i>6.454</i>   | <b>6.539</b>   | 19.478           |
| 29     | 8.755                       | 0.015            | 13.666         | 13.660         | 6.496          | <i>6.453</i>   | <b>6.571</b>   | 19.520           |
| 30     | 8.776                       | 0.039            | 13.707         | 13.510         | 6.508          | <i>6.452</i>   | <b>6.577</b>   | 19.537           |
| 31     | 8.793                       | 0.022            | 13.709         | 13.498         | 6.513          | <i>6.464</i>   | <b>6.574</b>   | 19.551           |
| 32     | 8.803                       | 0.006            | 13.663         | 13.456         | 6.522          | <i>6.488</i>   | <b>6.591</b>   | 19.601           |
| 33     | 8.809                       | 0.021            | 13.697         | 13.486         | 6.541          | <i>6.522</i>   | <b>6.616</b>   | 19.679           |
| 34     | 8.825                       | 0.005            | 13.681         | 13.470         | 6.566          | <i>6.548</i>   | <b>6.631</b>   | 19.745           |
| 35     | 8.841                       | 0.027            | 13.711         | 13.625         | 6.569          | <i>6.544</i>   | <b>6.646</b>   | 19.759           |
| 36     | 8.856                       | 0.016            | 13.687         | 13.613         | 6.606          | <i>6.550</i>   | <b>6.679</b>   | 19.835           |
| 37     | 8.862                       | 0.028            | 13.704         | 13.664         | 6.598          | <i>6.567</i>   | <b>6.676</b>   | 19.841           |
| 38     | 8.867                       | 0.013            | 13.701         | 13.637         | 6.627          | <i>6.570</i>   | <b>6.699</b>   | 19.896           |
| 39     | 8.872                       | 0.006            | 13.704         | 13.383         | 6.644          | <i>6.602</i>   | <b>6.703</b>   | 19.949           |
| 40     | 8.901                       | 0.014            | 13.668         | 13.512         | 6.643          | <i>6.610</i>   | <b>6.719</b>   | 19.972           |

The highest entropy value in each row is in bold and the lowest is in italics and shaded.

Table C1 (continued) Non-dominated feasible solutions achieved

| Design | Cost<br>(€10 <sup>6</sup> ) | Surplus Head (m) |                |                | Entropy        |                |                | Total<br>Entropy |
|--------|-----------------------------|------------------|----------------|----------------|----------------|----------------|----------------|------------------|
|        |                             | Peak<br>Demand   | Fire<br>Flow 1 | Fire<br>Flow 2 | Peak<br>Demand | Fire<br>Flow 1 | Fire<br>Flow 2 |                  |
| 41     | 8.905                       | 0.044            | 13.744         | 13.635         | 6.658          | <i>6.602</i>   | <b>6.732</b>   | 19.992           |
| 42     | 8.910                       | 0.067            | 13.744         | 13.555         | 6.660          | <i>6.626</i>   | <b>6.736</b>   | 20.022           |
| 43     | 8.937                       | 0.001            | 13.646         | 13.389         | 6.669          | <i>6.625</i>   | <b>6.763</b>   | 20.057           |
| 44     | 8.961                       | 0.019            | 13.669         | 13.644         | 6.689          | <i>6.644</i>   | <b>6.772</b>   | 20.105           |
| 45     | 8.982                       | 0.001            | 13.671         | 13.278         | 6.705          | <i>6.653</i>   | <b>6.795</b>   | 20.153           |
| 46     | 9.016                       | 0.021            | 13.698         | 13.307         | 6.711          | <i>6.657</i>   | <b>6.807</b>   | 20.175           |
| 47     | 9.019                       | 0.001            | 13.676         | 13.284         | 6.721          | <i>6.665</i>   | <b>6.815</b>   | 20.201           |
| 48     | 9.041                       | 0.003            | 13.674         | 13.408         | 6.727          | <i>6.669</i>   | <b>6.832</b>   | 20.228           |
| 49     | 9.048                       | 0.020            | 13.693         | 13.427         | 6.730          | <i>6.672</i>   | <b>6.835</b>   | 20.237           |
| 50     | 9.067                       | 0.033            | 13.708         | 13.440         | 6.733          | <i>6.676</i>   | <b>6.838</b>   | 20.247           |
| 51     | 9.100                       | 0.001            | 13.727         | 13.519         | 6.768          | <i>6.715</i>   | <b>6.837</b>   | 20.320           |
| 52     | 9.159                       | 1.3E-4           | 13.743         | 13.058         | 6.862          | <i>6.799</i>   | <b>6.903</b>   | 20.564           |
| 53     | 9.170                       | 0.011            | 13.756         | 13.071         | 6.870          | <i>6.806</i>   | <b>6.912</b>   | 20.588           |
| 54     | 9.211                       | 0.015            | 13.721         | 13.695         | 6.892          | <i>6.826</i>   | <b>6.949</b>   | 20.667           |
| 55     | 9.284                       | 0.032            | 13.712         | 13.695         | 6.906          | <i>6.812</i>   | <b>6.970</b>   | 20.688           |
| 56     | 9.332                       | 0.003            | 13.700         | 13.590         | 6.901          | <i>6.844</i>   | <b>7.005</b>   | 20.750           |
| 57     | 9.420                       | 0.005            | 13.705         | 13.594         | 6.925          | <i>6.869</i>   | <b>7.030</b>   | 20.824           |
| 58     | 9.458                       | 0.006            | 13.638         | 13.453         | 6.930          | <i>6.897</i>   | <b>7.013</b>   | 20.840           |
| 59     | 9.522                       | 0.003            | 13.682         | 13.762         | 6.970          | <i>6.900</i>   | <b>7.032</b>   | 20.902           |
| 60     | 9.536                       | 0.011            | 13.692         | 13.705         | 6.970          | <i>6.900</i>   | <b>7.056</b>   | 20.926           |
| 61     | 9.578                       | 0.027            | 13.646         | 13.607         | 6.953          | <i>6.916</i>   | <b>7.069</b>   | 20.938           |
| 62     | 9.624                       | 0.009            | 13.690         | 13.705         | 6.982          | <i>6.610</i>   | <b>7.068</b>   | 20.960           |
| 63     | 9.629                       | 0.059            | 13.672         | 13.769         | 6.961          | <i>6.922</i>   | <b>7.085</b>   | 20.968           |
| 64     | 9.641                       | 0.039            | 13.727         | 13.740         | 6.990          | <i>6.916</i>   | <b>7.076</b>   | 20.982           |
| 65     | 9.691                       | 0.026            | 13.651         | 13.764         | 7.003          | <i>6.969</i>   | <b>7.099</b>   | 21.071           |
| 66     | 9.747                       | 2.0E-6           | 13.659         | 13.690         | 7.010          | <i>6.959</i>   | <b>7.123</b>   | 21.092           |
| 67     | 9.804                       | 0.002            | 13.656         | 13.727         | 7.038          | <i>6.984</i>   | <b>7.156</b>   | 21.178           |
| 68     | 9.832                       | 0.005            | 13.663         | 13.716         | 7.052          | <i>6.995</i>   | <b>7.168</b>   | 21.215           |
| 69     | 9.872                       | 0.008            | 13.670         | 13.721         | 7.070          | <i>7.016</i>   | <b>7.186</b>   | 21.272           |
| 70     | 9.919                       | 0.002            | 13.665         | 13.694         | 7.103          | <i>7.046</i>   | <b>7.218</b>   | 21.367           |
| 71     | 9.945                       | 0.010            | 13.672         | 13.724         | 7.104          | <i>7.048</i>   | <b>7.221</b>   | 21.373           |
| 72     | 10.013                      | 0.006            | 13.662         | 13.728         | 7.111          | <i>7.055</i>   | <b>7.229</b>   | 21.395           |
| 73     | 10.037                      | 0.016            | 13.678         | 13.731         | 7.119          | <i>7.060</i>   | <b>7.237</b>   | 21.416           |
| 74     | 10.108                      | 0.009            | 13.667         | 13.724         | 7.127          | <i>7.069</i>   | <b>7.244</b>   | 21.440           |

The highest entropy value in each row is in bold and the lowest is in italics and shaded.
